# Supplementary material for: Anticipating changes in the HER2 status of breast tumours with disease progression—towards better treatment decisions in the new era of HER2-low breast cancers
Source: PubMed Central journal article supplement (PMC10307899; doi:10.1038/s41416-023-02287-x), 2023-04-29
Supplement: 41416_2023_2287_MOESM1_ESM.pdf [file 41416_2023_2287_MOESM1_ESM.pdf]

**Supplementary Table 1.** Detailed demographic, clinical, and histological data of the study patients and tumours at diagnosis according to the type of recurrence

|                                  | All<br>(n = 512)   | Primary tumours which<br>gave rise to local<br>recurrences<br>(n = 145) | Primary tumours<br>which gave rise to<br>distant metastases<br>(n = 367) |
|----------------------------------|--------------------|-------------------------------------------------------------------------|--------------------------------------------------------------------------|
| Age at diagnosis (years)         |                    |                                                                         |                                                                          |
| Mean ± SD                        | 55.8 ± 12.9        | 56.9 ± 14.1                                                             | 55.4 ± 12.4                                                              |
| Median [min-max]                 | 56.0 [25.0 - 89.0] | 56.0 [26.0 - 89.0]                                                      | 55.0 [25.0 - 87.0]                                                       |
| <i>P</i> -value                  |                    |                                                                         | 0.335                                                                    |
| Unifocal tumour                  |                    |                                                                         |                                                                          |
| Yes                              | 397 (77.5%)        | 123 (84.8%)                                                             | 274 (79.3%)                                                              |
| No                               | 115 (22.5%)        | 22 (15.2%)                                                              | 93 (25.3%)                                                               |
| <i>P</i> -value                  |                    |                                                                         | <b>0.013</b>                                                             |
| Histology                        |                    |                                                                         |                                                                          |
| IDC                              | 412 (80.5%)        | 121 (83.4%)                                                             | 291 (80.0%)                                                              |
| ILC                              | 91 (17.8%)         | 22 (15.2%)                                                              | 69 (18.8%)                                                               |
| Other                            | 9 (1.8%)           | 2 (1.4%)                                                                | 7 (1.9%)                                                                 |
| <i>P</i> -value                  |                    |                                                                         | 0.560                                                                    |
| Tumour Size (cm)                 |                    |                                                                         |                                                                          |
| Mean ± SD                        | 2.7 ± 1.9          | 1.9 ± 1.4                                                               | 3.0 ± 1.9                                                                |
| Median [min-max]                 | 2.2 [0.1 - 10.5]   | 1.5 [0.1 - 10]                                                          | 2.5 [0.2 - 10.5]                                                         |
| Missing data                     | 6                  | 0                                                                       | 6                                                                        |
| <i>P</i> -value                  |                    |                                                                         | <b>&lt; 0.001</b>                                                        |
| E&E grade                        |                    |                                                                         |                                                                          |
| I                                | 83 (16.4%)         | 38 (26.4%)                                                              | 45 (12.5%)                                                               |
| II                               | 264 (52.3%)        | 62 (43.1%)                                                              | 202 (56.0%)                                                              |
| III                              | 158 (31.3%)        | 44 (30.6%)                                                              | 114 (31.6%)                                                              |
| Missing data                     | 7                  | 1                                                                       | 6                                                                        |
| <i>P</i> -value                  |                    |                                                                         | <b>&lt; 0.001</b>                                                        |
| Glandular differentiation        |                    |                                                                         |                                                                          |
| I                                | 7 (1.4%)           | 6 (4.2%)                                                                | 1 (0.3%)                                                                 |
| II                               | 146 (28.9%)        | 49 (34.0%)                                                              | 97 (26.9%)                                                               |
| III                              | 352 (69.7%)        | 89 (61.8%)                                                              | 263 (72.9%)                                                              |
| Missing data                     | 7                  | 1                                                                       | 6                                                                        |
| <i>P</i> -value                  |                    |                                                                         | <b>&lt; 0.001</b>                                                        |
| Nuclear grade                    |                    |                                                                         |                                                                          |
| I                                | 18 (3.6%)          | 10 (6.9%)                                                               | 8 (2.2%)                                                                 |
| II                               | 330 (65.3%)        | 93 (64.6%)                                                              | 237 (65.7%)                                                              |
| III                              | 157 (31.1%)        | 41 (28.5%)                                                              | 116 (32.1%)                                                              |
| Missing data                     | 7                  | 1                                                                       | 6                                                                        |
| <i>P</i> -value                  |                    |                                                                         | <b>0.032</b>                                                             |
| Mitosis score                    |                    |                                                                         |                                                                          |
| I                                | 237 (46.9%)        | 78 (54.2%)                                                              | 159 (44.0%)                                                              |
| II                               | 124 (24.6%)        | 25 (17.4%)                                                              | 99 (27.4%)                                                               |
| III                              | 144 (28.5%)        | 41 (28.5%)                                                              | 103 (28.5%)                                                              |
| Missing data                     | 7                  | 1                                                                       | 6                                                                        |
| <i>P</i> -value                  |                    |                                                                         | <b>0.039</b>                                                             |
| Lymph node status                |                    |                                                                         |                                                                          |
| N0-N0i+                          | 235 (45.9%)        | 103 (71.1%)                                                             | 132 (36.0%)                                                              |
| N1-N1mic                         | 188 (36.7%)        | 37 (25.5%)                                                              | 151 (41.1%)                                                              |
| N2-N3                            | 89 (17.4%)         | 5 (3.4%)                                                                | 84 (22.9%)                                                               |
| <i>P</i> -value                  |                    |                                                                         | <b>&lt; 0.001</b>                                                        |
| Disease stage                    |                    |                                                                         |                                                                          |
| I                                | 165 (32.2%)        | 86 (59.3%)                                                              | 79 (21.5%)                                                               |
| II                               | 179 (35.0%)        | 30 (20.7%)                                                              | 149 (40.6%)                                                              |
| III                              | 128 (25.0%)        | 27 (18.6%)                                                              | 101 (27.5%)                                                              |
| IV                               | 40 (7.8%)          | 2 (1.4%)                                                                | 38 (10.4%)                                                               |
| <i>P</i> -value                  |                    |                                                                         | <b>&lt; 0.001</b>                                                        |
| Oestrogen receptor expression    |                    |                                                                         |                                                                          |
| Positive                         | 413 (81.6%)        | 115 (79.9%)                                                             | 298 (82.3%)                                                              |
| Negative                         | 93 (18.4%)         | 29 (20.1%)                                                              | 64 (17.7%)                                                               |
| Missing data                     | 6                  | 1                                                                       | 5                                                                        |
| <i>P</i> -value                  |                    |                                                                         | 0.519                                                                    |
| Progesterone receptor expression |                    |                                                                         |                                                                          |
| Positive                         | 322 (66.4%)        | 98 (69.0%)                                                              | 224 (76.7%)                                                              |
| Negative                         | 163 (33.6%)        | 44 (31.0%)                                                              | 119 (34.7%)                                                              |
| Missing data                     | 27                 | 3                                                                       | 24                                                                       |
| <i>P</i> -value                  |                    |                                                                         | 0.432                                                                    |
| HER2 status (IHC+/-FISH)         |                    |                                                                         |                                                                          |
| 0                                | 201 (39.3%)        | 64 (44.1%)                                                              | 137 (37.3%)                                                              |

|                                                         |                  |                    |                   |
|---------------------------------------------------------|------------------|--------------------|-------------------|
| 1+                                                      | 155 (30.3%)      | 44 (30.3%)         | 111 (30.2%)       |
| 2+ non-amplified                                        | 75 (14.6%)       | 18 (12.4%)         | 57 (15.5%)        |
| 2+ amplified                                            | 14 (2.7%)        | 1 (0.7%)           | 13 (3.5%)         |
| 3+                                                      | 67 (13.1%)       | 18 (12.4%)         | 49 (13.4%)        |
| <i>P</i> -value                                         |                  |                    | 0.279             |
| Time to recurrence (months)                             |                  |                    |                   |
| Mean $\pm$ SD                                           | 72.3 $\pm$ 50.8  | 88.2 $\pm$ 56.1    | 66.0 $\pm$ 47.2   |
| Median [min-max]                                        | 60 [1.0 - 240.0] | 77.0 [6.0 - 235.0] | 60 [1.0 - 240.0]  |
| <i>P</i> -value                                         |                  |                    | <b>&lt; 0.001</b> |
| HER2 status change between primary and recurrent tumour |                  |                    |                   |
| Stable HER2-negative                                    | 104 (20.3%)      | 29 (20.0%)         | 75 (20.4%)        |
| Stable HER2-low                                         | 152 (29.7%)      | 39 (26.9%)         | 113 (30.8%)       |
| Stable HER-positive                                     | 65 (12.7%)       | 17 (11.7%)         | 48 (13.1%)        |
| HER2-negative to HER2-low                               | 90 (17.6%)       | 32 (22.1%)         | 58 (15.8%)        |
| HER2-negative to HER2-positive                          | 8 (1.6%)         | 3 (2.1%)           | 5 (1.4%)          |
| HER2-low to HER2-negative                               | 67 (13.1%)       | 21 (14.5%)         | 46 (12.5%)        |
| HER2-low to HER2-positive                               | 10 (2.0%)        | 2 (1.4%)           | 8 (2.2%)          |
| HER2-positive to HER2-negative                          | 2 (0.4%)         | 1 (0.7%)           | 1 (0.3%)          |
| HER2-positive to HER2-low                               | 14 (2.7%)        | 1 (0.7%)           | 13 (3.5%)         |
| <i>P</i> -value                                         |                  |                    | 0.303             |

---

E&E: Elston and Ellis; FISH: fluorescent in situ hybridisation; HER2: human epidermal growth factor receptor 2; IDC: invasive ductal carcinoma; IHC: immunohistochemistry; ILC: invasive lobular carcinoma; SD: standard deviation  
In bold: *P*-values indicative of a statistical significance

**Supplementary Table 2.** Clinical, pathological, and immunohistochemical characteristics of breast cancer patients and tumours for the subgroup with HR-positive/HER2-negative tumours at diagnosis, by changes in the HER2 status and the type of relapse

| Parameter                 | All                                         |                                                                          | Local recurrences                           |                                                                          | Distant metastases                          |                                                                          |
|---------------------------|---------------------------------------------|--------------------------------------------------------------------------|---------------------------------------------|--------------------------------------------------------------------------|---------------------------------------------|--------------------------------------------------------------------------|
|                           | Tumours which relapsed as HER2-low (n = 80) | Tumours which relapsed as HER2-negative (unchanged HER2 status) (n = 77) | Tumours which relapsed as HER2-low (n = 25) | Tumours which relapsed as HER2-negative (unchanged HER2 status) (n = 22) | Tumours which relapsed as HER2-low (n = 55) | Tumours which relapsed as HER2-negative (unchanged HER2 status) (n = 55) |
| Age at diagnosis (years)  |                                             |                                                                          |                                             |                                                                          |                                             |                                                                          |
| Mean ± SD                 | 55.2 ± 10.9                                 | 57.8 ± 14.0                                                              | 55.8 ± 10.1                                 | 63.2 ± 17.5                                                              | 55.0 ± 11.3                                 | 55.6 ± 11.8                                                              |
| Median [min-max]          | 56.0 [29.0 - 81.0]                          | 57.0 [34.0 - 89.0]                                                       | 56.0 [38.0 - 79.0]                          | 70.5 [34.0 - 89.0]                                                       | 56.0 [29.0 - 81.0]                          | 55.0 [36.0 - 87.0]                                                       |
| P-values                  |                                             | 0.207                                                                    |                                             | 0.075                                                                    |                                             | 0.780                                                                    |
| Unifocal tumour           |                                             |                                                                          |                                             |                                                                          |                                             |                                                                          |
| Yes                       | 66 (82.5%)                                  | 62 (80.5%)                                                               | 22 (88.0%)                                  | 20 (90.9%)                                                               | 44 (80.0%)                                  | 42 (76.4%)                                                               |
| No                        | 14 (17.5%)                                  | 15 (19.5%)                                                               | 3 (12.0%)                                   | 2 (9.1%)                                                                 | 11 (20.0%)                                  | 13 (23.6%)                                                               |
| P-values                  |                                             | 0.749                                                                    |                                             | 1.000                                                                    |                                             | 0.644                                                                    |
| Histology                 |                                             |                                                                          |                                             |                                                                          |                                             |                                                                          |
| IDC                       | 56 (70.0%)                                  | 54 (70.1%)                                                               | 19 (76.0%)                                  | 16 (72.7%)                                                               | 37 (67.3%)                                  | 38 (69.1%)                                                               |
| ILC                       | 22 (27.5%)                                  | 20 (26.0%)                                                               | 6 (24.0%)                                   | 5 (22.7%)                                                                | 16 (29.1%)                                  | 15 (27.3%)                                                               |
| Other                     | 2 (2.5%)                                    | 3 (3.9%)                                                                 | 0 (0.0%)                                    | 1 (4.5%)                                                                 | 2 (3.6%)                                    | 2 (3.6%)                                                                 |
| P-values                  |                                             | 0.909                                                                    |                                             | 0.859                                                                    |                                             | 1.000                                                                    |
| Tumour Size (cm)          |                                             |                                                                          |                                             |                                                                          |                                             |                                                                          |
| Mean ± SD                 | 2.1 ± 1.3                                   | 2.7 ± 2.3                                                                | 1.2 ± 0.6                                   | 1.6 ± 1.0                                                                | 2.5 ± 1.4                                   | 3.2 ± 2.5                                                                |
| Median [min-max]          | 1.8 [0.4 - 6.5]                             | 2.0 [0.1 - 10.5]                                                         | 1.1 [0.4 - 2.8]                             | 1.4 [0.1 - 4.3]                                                          | 2.0 [0.7 - 6.5]                             | 2.3 [0.2 - 10.5]                                                         |
| Missing data              | 3                                           | 1                                                                        | 0                                           | 0                                                                        | 3                                           | 1                                                                        |
| P-value                   |                                             | 0.162                                                                    |                                             | 0.253                                                                    |                                             | 0.351                                                                    |
| E&E grade                 |                                             |                                                                          |                                             |                                                                          |                                             |                                                                          |
| I                         | 20 (25.0%)                                  | 17 (22.6%)                                                               | 8 (32.0%)                                   | 7 (31.8%)                                                                | 12 (21.8%)                                  | 10 (18.9%)                                                               |
| II                        | 45 (56.3%)                                  | 38 (50.7%)                                                               | 13 (52.0%)                                  | 10 (45.5%)                                                               | 32 (58.2%)                                  | 28 (52.8%)                                                               |
| III                       | 15 (18.8%)                                  | 20 (26.7%)                                                               | 4 (16.0%)                                   | 5 (22.7%)                                                                | 11 (20.0%)                                  | 15 (28.3%)                                                               |
| Missing data              | 0                                           | 2                                                                        | 0                                           | 0                                                                        | 0                                           | 2                                                                        |
| P-values                  |                                             | 0.500                                                                    |                                             | 0.926                                                                    |                                             | 0.598                                                                    |
| Glandular differentiation |                                             |                                                                          |                                             |                                                                          |                                             |                                                                          |
| I                         | 2 (2.5%)                                    | 2 (2.6%)                                                                 | 2 (8.2%)                                    | 2 (9.1%)                                                                 | 0 (0.0%)                                    | 0 (0.0%)                                                                 |
| II                        | 26 (32.5%)                                  | 21 (27.6%)                                                               | 8 (32.0%)                                   | 6 (27.3%)                                                                | 18 (32.7%)                                  | 15 (27.8%)                                                               |
| III                       | 52 (65.0%)                                  | 53 (69.7%)                                                               | 15 (60.0%)                                  | 14 (63.6%)                                                               | 37 (67.3%)                                  | 39 (72.2%)                                                               |
| Missing data              | 0                                           | 1                                                                        | 0                                           | 0                                                                        | 0                                           | 1                                                                        |
| P-values                  |                                             | 0.848                                                                    |                                             | 1.000                                                                    |                                             | 0.574                                                                    |
| Nuclear grade             |                                             |                                                                          |                                             |                                                                          |                                             |                                                                          |
| I                         | 6 (7.5%)                                    | 7 (9.2%)                                                                 | 3 (12.0%)                                   | 4 (18.2%)                                                                | 3 (5.5%)                                    | 3 (5.6%)                                                                 |
| II                        | 58 (72.5%)                                  | 52 (68.4%)                                                               | 19 (76.0%)                                  | 13 (59.1%)                                                               | 39 (70.9%)                                  | 39 (72.2%)                                                               |
| III                       | 16 (20.0%)                                  | 17 (22.4%)                                                               | 3 (12.0%)                                   | 5 (22.7%)                                                                | 13 (23.6%)                                  | 12 (22.2%)                                                               |
| Missing data              | 0                                           | 1                                                                        | 0                                           | 0                                                                        | 0                                           | 1                                                                        |
| P-values                  |                                             | 0.847                                                                    |                                             | 1.000                                                                    |                                             | 1.000                                                                    |
| Mitosis score             |                                             |                                                                          |                                             |                                                                          |                                             |                                                                          |
| I                         | 48 (60.0%)                                  | 39 (51.3%)                                                               | 16 (64.0%)                                  | 15 (68.2%)                                                               | 32 (58.2%)                                  | 24 (44.4%)                                                               |
| II-III                    | 32 (40.0%)                                  | 37 (48.7%)                                                               | 9 (36.0%)                                   | 7 (31.8%)                                                                | 23 (41.8%)                                  | 30 (55.6%)                                                               |

|                                   |                   |       |                   |  |                    |  |                   |  |                   |  |                   |
|-----------------------------------|-------------------|-------|-------------------|--|--------------------|--|-------------------|--|-------------------|--|-------------------|
| Missing data                      | 0                 |       | 1                 |  | 0                  |  | 0                 |  | 0                 |  | 1                 |
| <i>P</i> -values                  |                   | 0.275 |                   |  | 0.763              |  |                   |  | 0.151             |  |                   |
| Mitotic index (/mm <sup>2</sup> ) |                   |       |                   |  |                    |  |                   |  |                   |  |                   |
| Mean ± SD                         | 3.5 ± 4.3         |       | 5.3 ± 6.8         |  | 4.7 ± 5.4          |  | 3.7 ± 4.4         |  | 3.0 ± 3.7         |  | 6.0 ± 7.6         |
| Median [min-max]                  | 1.9 [0.4 - 16.0]  |       | 0.4 [0.4 - 33.0]  |  | 1.7 [0.4 - 15.5]   |  | 1.7 [0.4 - 16.5]  |  | 1.9 [0.4 - 16.0]  |  | 3.8 [0.4 - 33.0]  |
| Missing data                      | 33                |       | 24                |  | 11                 |  | 6                 |  | 22                |  | 18                |
| <i>P</i> -values                  |                   | 0.117 |                   |  | 0.786              |  |                   |  | 0.057             |  |                   |
| Lymph node status                 |                   |       |                   |  |                    |  |                   |  |                   |  |                   |
| N0-N0i+                           | 47 (58.8%)        |       | 39 (50.7%)        |  | 20 (80.0%)         |  | 16 (72.7%)        |  | 27 (49.1%)        |  | 23 (41.8%)        |
| N1-N1mic                          | 20 (25.0%)        |       | 23 (29.9%)        |  | 4 (16.0%)          |  | 6 (27.3%)         |  | 16 (29.1%)        |  | 17 (30.9%)        |
| N2-N3                             | 13 (16.2%)        |       | 15 (19.4%)        |  | 1 (4.0%)           |  | 0 (0.0%)          |  | 12 (21.8%)        |  | 15 (27.3%)        |
| <i>P</i> -values                  |                   | 0.595 |                   |  | 0.851              |  |                   |  | 0.710             |  |                   |
| Disease stage                     |                   |       |                   |  |                    |  |                   |  |                   |  |                   |
| I                                 | 37 (46.3%)        |       | 31 (40.3%)        |  | 19 (76.0%)         |  | 14 (63.7%)        |  | 18 (32.7%)        |  | 17 (30.9%)        |
| II                                | 26 (32.5%)        |       | 19 (24.7%)        |  | 5 (20.0%)          |  | 5 (22.7%)         |  | 21 (38.2%)        |  | 14 (25.5%)        |
| III                               | 16 (20.0%)        |       | 19 (24.7%)        |  | 1 (4.0%)           |  | 3 (13.6%)         |  | 15 (27.3%)        |  | 16 (29.1%)        |
| IV                                | 1 (1.3%)          |       | 8 (10.4%)         |  | 0 (0.0%)           |  | 0 (0.0%)          |  | 1 (1.8%)          |  | 8 (14.5%)         |
| <i>P</i> -values                  |                   | 0.062 |                   |  | 0.406              |  |                   |  | 0.075             |  |                   |
| Oestrogen receptor expression     |                   |       |                   |  |                    |  |                   |  |                   |  |                   |
| Negative                          | 0 (0.0%)          |       | 1 (1.3%)          |  | 0 (0.0%)           |  | 0 (0.0%)          |  | 0 (0.0%)          |  | 1 (1.8%)          |
| Positive                          | 80 (100%)         |       | 76 (98.7%)        |  | 25 (100%)          |  | 22 (100%)         |  | 55 (100%)         |  | 54 (98.2%)        |
| Missing data                      | 0                 |       | 1                 |  | 0                  |  | 0                 |  | 0                 |  | 1                 |
| <i>P</i> -values                  |                   | 0.490 |                   |  | 1.000              |  |                   |  | 1.000             |  |                   |
| Progesterone receptor expression  |                   |       |                   |  |                    |  |                   |  |                   |  |                   |
| Negative                          | 15 (21.1%)        |       | 9 (12.5%)         |  | 1 (4.0%)           |  | 4 (19.0%)         |  | 14 (30.4%)        |  | 5 (9.8%)          |
| Positive                          | 56 (78.9%)        |       | 63 (87.5%)        |  | 24 (96.0%)         |  | 17 (81.0%)        |  | 32 (69.6%)        |  | 46 (90.2%)        |
| Missing data                      | 9                 |       | 5                 |  | 0                  |  | 1                 |  | 9                 |  | 4                 |
| <i>P</i> -values                  |                   | 0.168 |                   |  | 0.163              |  |                   |  | 0.010             |  |                   |
| Ki67 expression                   |                   |       |                   |  |                    |  |                   |  |                   |  |                   |
| Mean ± SD                         | 22.9 ± 14.5       |       | 27.8 ± 19.4       |  | 30.0 ± 9.4         |  | 25.3 ± 25.7       |  | 20.5 ± 15.3       |  | 29.7 ± 14.0       |
| Median [min-max]                  | 23.5 [1.0 - 50.0] |       | 25.0 [1.0 - 90.0] |  | 25.0 [20.0 - 40.0] |  | 20.0 [8.0 - 90.0] |  | 15.0 [1.0 - 50.0] |  | 30.0 [1.0 - 50.0] |
| Missing data                      | 60                |       | 56                |  | 20                 |  | 13                |  | 40                |  | 43                |
| <i>P</i> -values                  |                   | 0.479 |                   |  | 0.177              |  |                   |  | 0.123             |  |                   |
| Metastatic site                   |                   |       |                   |  |                    |  |                   |  |                   |  |                   |
| Liver                             | -                 |       | -                 |  | -                  |  | -                 |  | 16 (29.1%)        |  | 14 (25.5%)        |
| Bone                              | -                 |       | -                 |  | -                  |  | -                 |  | 9 (16.4%)         |  | 16 (29.1%)        |
| Skin and muscle                   | -                 |       | -                 |  | -                  |  | -                 |  | 9 (16.4%)         |  | 7 (12.7%)         |
| Lymph nodes                       | -                 |       | -                 |  | -                  |  | -                 |  | 10 (18.2%)        |  | 6 (10.9%)         |
| Lung and pleura                   | -                 |       | -                 |  | -                  |  | -                 |  | 4 (7.3%)          |  | 4 (7.3%)          |
| Gynaecological tract              | -                 |       | -                 |  | -                  |  | -                 |  | 3 (5.5%)          |  | 4 (7.3%)          |
| Gastrointestinal tract            | -                 |       | -                 |  | -                  |  | -                 |  | 3 (5.5%)          |  | 0 (0.0%)          |
| Brain                             | -                 |       | -                 |  | -                  |  | -                 |  | 0 (0.0%)          |  | 0 (0.0%)          |
| Other                             | -                 |       | -                 |  | -                  |  | -                 |  | 1 (1.8%)          |  | 4 (7.3%)          |
| <i>P</i> -values                  |                   | -     |                   |  | -                  |  |                   |  | 0.344             |  |                   |

|                             |                    |                    |                      |                    |                    |                    |
|-----------------------------|--------------------|--------------------|----------------------|--------------------|--------------------|--------------------|
| Time to recurrence (months) |                    |                    |                      |                    |                    |                    |
| Mean $\pm$ SD               | 93.7 $\pm$ 52.8    | 73.8 $\pm$ 52.2    | 108.4 $\pm$ 57.8     | 67.0 $\pm$ 52.5    | 87.0 $\pm$ 49.5    | 76.5 $\pm$ 52.3    |
| Median [min-max]            | 84.0 [2.0 - 240.0] | 60.0 [1.0 - 212.0] | 110.0 [18.0 - 215.0] | 49.0 [6.0 - 212.0] | 84.0 [2.0 - 240.0] | 60.0 [1.0 - 204.0] |
| <i>P</i> -values            |                    | <b>0.014</b>       |                      | <b>0.006</b>       |                    | 0.275              |

---

BC: breast cancer; E&E: Elston and Ellis; HER2: human epidermal growth factor receptor 2; HR: hormone receptor; IDC: invasive ductal carcinoma; ILC: invasive lobular carcinoma; SD: standard deviation

In bold: *P*-values indicative of a statistical significance

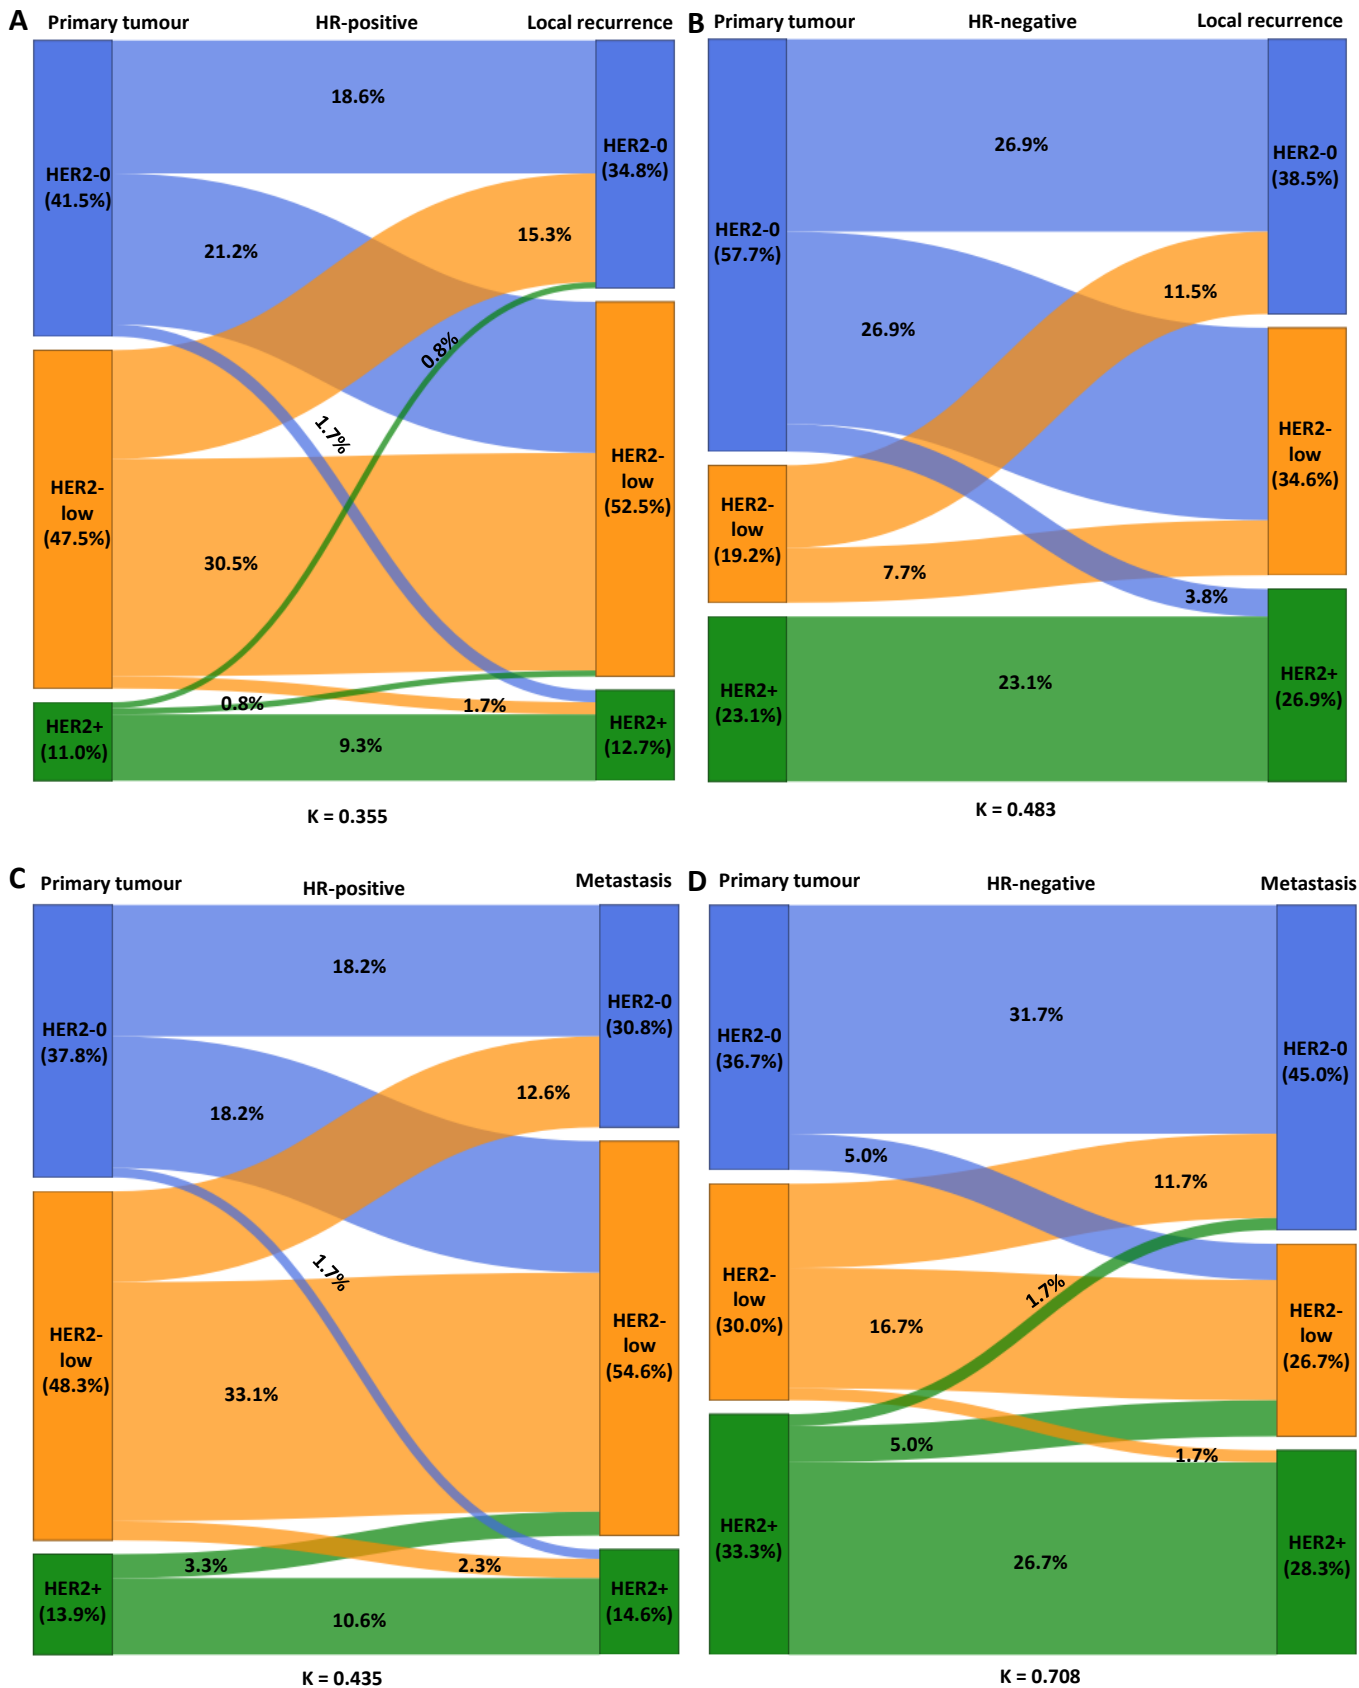

Supplementary Figure 1. Changes in the HER2 status between primary breast tumours and matched relapses (local or distant recurrence), stratified by the hormone receptor (HR) expression. Sankey diagrams illustrating the HER2 status changes for local recurrence (A-B) and distant metastases (C-D) according to the HR status, with specific percentages. HER2-0: HER2-negative, HER2+: HER2-positive
